# Supplementary material for: Nanospray HX-MS configuration for structural interrogation of large protein systems
Source: Royal Society of Chemistry journal article supplement (doi:10.1039/c6an02707e), 2017-01-01
Supplement: c6an02707e1.pdf [file c6an02707e1.pdf]

## Electronic Supplementary Information

### Nanospray HX-MS configuration for structural interrogation of large protein systems

Joey G. Sheff,<sup>a</sup> Morgan Hepburn,<sup>b</sup> Yaping Yu,<sup>b</sup> Susan P. Lees-Miller,<sup>b</sup> David C Schriemer<sup>a,b</sup>

<sup>a</sup>Department of Chemistry, University of Calgary, Calgary, AB T2N 1N4, Canada.

<sup>b</sup>Department of Biochemistry and Molecular Biology, University of Calgary, Calgary, AB, T2N 1N4, Canada

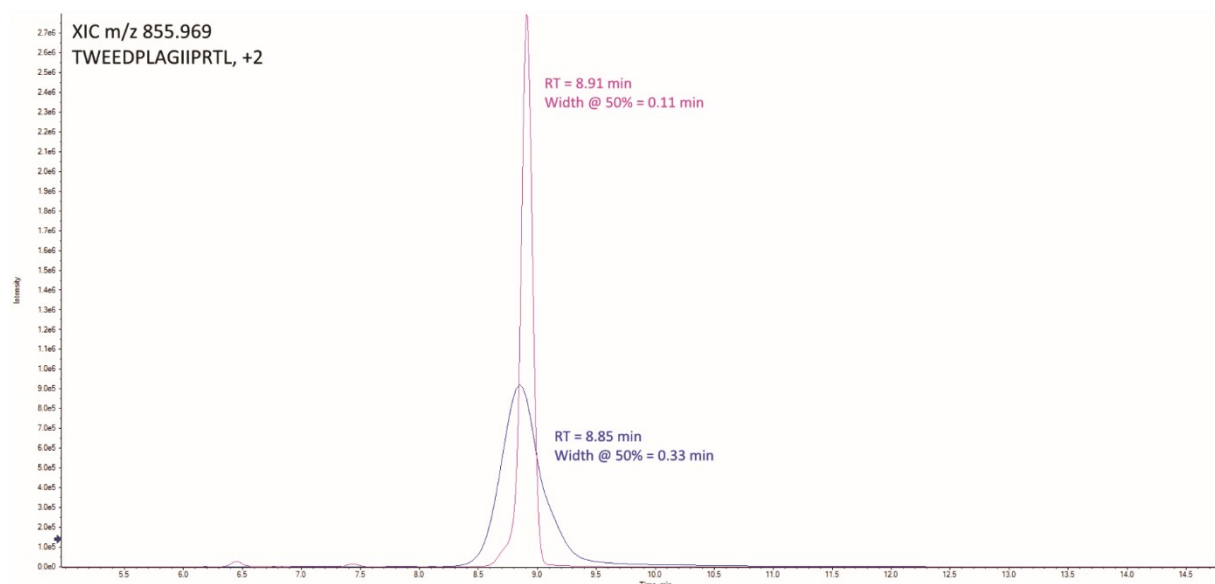

**Figure S1.** Extracted ion chromatograms for m/z 855.969 (Eg5, TWEEDPLAGIIPRTL, +2) collected in the micro flow regime with a conventionally-cooled column (blue) and the in-source cooler (pink). Identical amounts injected (10 pmol).

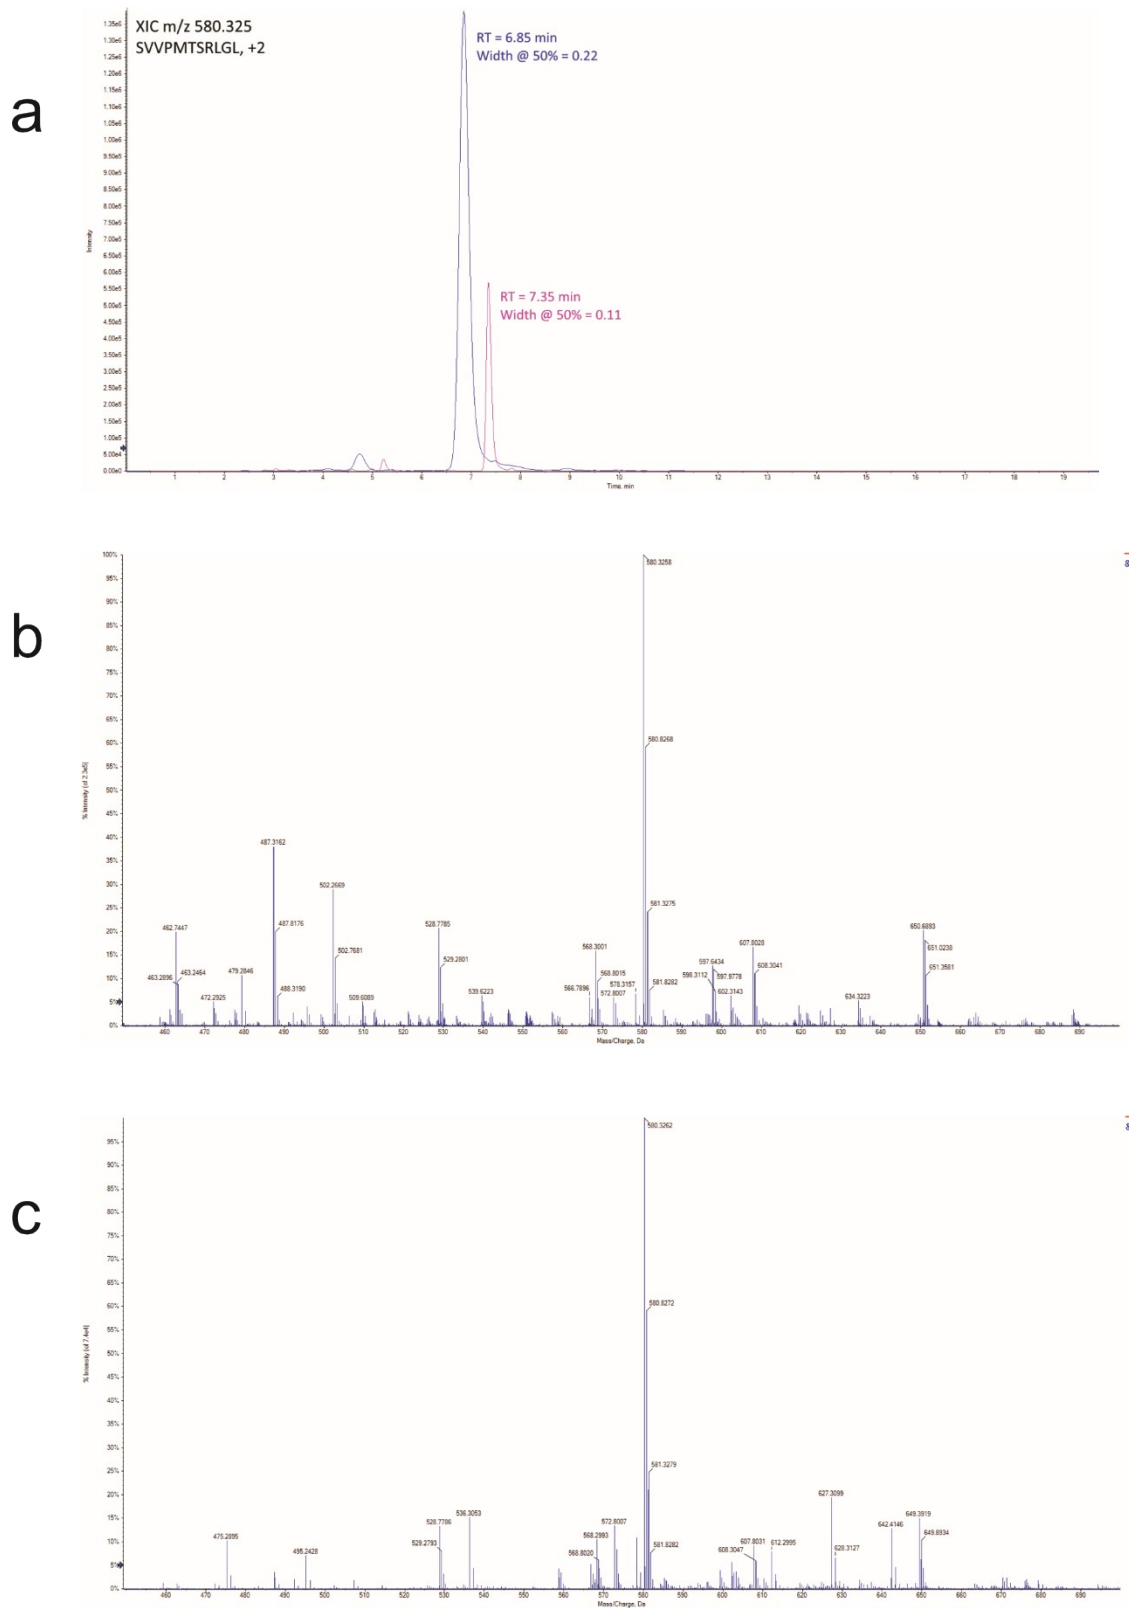

**Figure S2.** (a) Extracted ion chromatograms for m/z 580.325 (DNA-PKcs, SVVPMTSRLGL, +2) collected with the conventional microflow system (blue) and the in-source nanoHX-MS configuration (pink). Injected amounts were 10-fold lower for the nanoHX-MS system (0.5 pmol vs 5 pmol). (b) Corresponding MS spectrum extracted from a 0.22 min window centered on 6.85 min for the sample collected with the conventional microflow system. (c) Corresponding MS spectra extracted from a 0.11 min window centered around 7.35 min for sample collected with the in-source

nanoHX-MS configuration. MS intensities are shown relative to the most intense peak in the spectrum. For (b) and (c), spectra represent integrations over the natural peak width of a representative LC feature, and show a reduction in spectral complexity for the nano source when attempting to get the “best” data for a given feature.

[see separate file]

**Figure S3.** Sequence coverage map for DNA-PKcs for deuterated proteolytic peptides analyzed with the in-source nanoHX-MS system.
